# Supplementary material for: Results of a multi-country exploratory survey of approaches and methods for IMCI case management training
Source: Health Res Policy Syst. 2009 Jul 17;7:18. doi: 10.1186/1478-4505-7-18 (PMC2723104; doi:10.1186/1478-4505-7-18)
Supplement: Additional file 4 — Table 4: Adaptations made to IMCI training materials, by country. This table summarises the adaptations made to IMCI training materials by country [file 1478-4505-7-18-S4.doc]

*Table 1:* Adaptations made to IMCI training materials by country

| **REGION** | **COUNTRY** | **Exercises added** | **Exercises reviewed and changed** | **Drills added** | **Drills adapted** | **Local video developed** | **Local photo booklet developed** | **Role plays added** | **Other** |
| --- | --- | --- | --- | --- | --- | --- | --- | --- | --- |
| AFRO | Eritrea |  |  |  |  |  |  |  |  |
| Ethiopia | √ | √ |  | √ |  |  |  |  |
| Ghana |  | √ |  |  |  |  |  |  |
| Kenyaa | √ | √ |  |  |  |  | √ |  |
| Madagascar | √ | √ |  | √ |  |  | √ |  |
| Niger |  | √ |  | √ |  |  | √ |  |
| Nigeria | √ | √ | √ |  |  |  | √ |  |
| United Rep. of Tanzania |  |  |  | √ |  |  | √ |  |
| Uganda |  |  |  |  |  |  |  |  |
| Zambia |  |  |  |  |  |  |  |  |
| WPRO | Cambodia |  |  |  |  |  |  |  | √ a |
| China |  | √ |  |  |  |  |  |  |
| Fiji | √ | √ | √ | √ |  |  | √ |  |
| Papua New Guinea |  |  |  |  |  |  |  |  |
| Vietnam |  | √ |  | √ |  |  |  |  |
| SEARO | India |  | √ |  | √ | √ | √ | √ | √b |
| Indonesia |  | √ |  | √ |  | √ |  |  |
| Nepal |  | √ |  |  | √ |  |  | √c |
| EURO | Kazakhstan | √ | √ |  | √ |  |  |  |  |
| Kosovo |  | √ |  | √ |  |  |  |  |
| Republic of Moldova | √ | √ |  | √ |  |  |  |  |
| Uzbekistan |  | √ |  | √ | √ |  |  |  |
| EMRO | Sudan | √ | √ | √ | √ |  |  |  |  |
| PAHO | Peru | √ | √ |  | √ |  |  | √ |  |
| Nicaragua |  |  |  |  |  |  |  |  |

*Footnotes*: **a**: MRDT practical sessions added; **b:** different packages for different workers **c:** few exercises removed.
